# Supplementary material
Source: PubMed Central journal article supplement (PMC6957748)
Supplement: NIHMS1545162-supplement-Appendix_II.pdf [file NIHMS1545162-supplement-Appendix_II.pdf]

## ENCUESTA: EXPERIENCIAS DE LA VIDA<sup>1</sup>

A continuación se mencionan algunas cosas que quizás le hayan ocurrido **desde que quedó embarazada**. Favor de circular (Sí) para aquellos temas que haya experimentado **desde que quedó embarazada**, y circule “No” si no ha experimentado dichos temas. Si circula “**Sí**”, entonces circule unos de los siguientes números para mostrar si piensa que esto ha tenido un impacto negativo o malo, o un impacto positivo o bueno. Por ejemplo, circule -3 si fue un impacto extremadamente negativo o malo. Circule 0 si pensó que no tuvo ningún impacto. Circule +3 para indicar un impacto extremadamente positivo.

|      |                                                                                                                |                                                | Impacto en su vida Negativo/Malo o Positivo/Bueno |                        |               |            |                      |                        |                         |
|------|----------------------------------------------------------------------------------------------------------------|------------------------------------------------|---------------------------------------------------|------------------------|---------------|------------|----------------------|------------------------|-------------------------|
|      |                                                                                                                |                                                | ---Negativo/Malo---                               |                        |               | No Impacto | ---Positivo/Bueno--- |                        |                         |
|      |                                                                                                                |                                                | Extremadamente Negativo                           | Moderadamente Negativo | Algo Negativo |            | Algo Positivo        | Moderadamente Positivo | Extremadamente Positivo |
|      | DESDE QUE QUEDÓ EMBARAZADA:                                                                                    |                                                |                                                   |                        |               |            |                      |                        |                         |
| 112. | ¿Se ha casado?                                                                                                 | NO (0) SÍ (1) →<br>REHÚSA (98)<br>NO SABE (99) | -3                                                | -2                     | -1            | 0          | +1                   | +2                     | +3                      |
| 113. | ¿Ha estado en la cárcel o institución similar?                                                                 | NO (0) SÍ (1) →<br>REHÚSA (98)<br>NO SABE (99) | -3                                                | -2                     | -1            | 0          | +1                   | +2                     | +3                      |
| 114. | ¿Su esposo o novio ha muerto?                                                                                  | NO (0) SÍ (1) →<br>REHÚSA (98)<br>NO SABE (99) | -3                                                | -2                     | -1            | 0          | +1                   | +2                     | +3                      |
| 115. | ¿Ha tenido un cambio drástico en sus hábitos de dormir (duerme más o menos)?                                   | NO (0) SÍ (1) →<br>REHÚSA (98)<br>NO SABE (99) | -3                                                | -2                     | -1            | 0          | +1                   | +2                     | +3                      |
| 116. | ¿Ha experimentado la muerte de un familiar cercano (su hijo, padre, madre, hermana, hermano, abuelo/a u otro)? | NO (0) SÍ (1) →<br>REHÚSA (98)<br>NO SABE (99) | -3                                                | -2                     | -1            | 0          | +1                   | +2                     | +3                      |
| 117. | ¿Ha tenido un cambio mayor en su hábitos alimenticios (come más o menos)?                                      | NO (0) SÍ (1) →<br>REHÚSA (98)<br>NO SABE (99) | -3                                                | -2                     | -1            | 0          | +1                   | +2                     | +3                      |
| 118. | ¿Ha experimentado una ejecución hipotecaria o de un préstamo?                                                  | NO (0) SÍ (1) →<br>REHÚSA (98)<br>NO SABE (99) | -3                                                | -2                     | -1            | 0          | +1                   | +2                     | +3                      |

<sup>1</sup> Saron IG, Johnson JH, Siegel JM. *Assessing the impact of the life experiences survey. J Consult Clin Psychol* 1978;46:932-46.

|      |                                                                                                                                |                                                    | Impacto en su vida Negativo/Malo o Positivo/Bueno |                                |                  |               |                      |                                |                                 |
|------|--------------------------------------------------------------------------------------------------------------------------------|----------------------------------------------------|---------------------------------------------------|--------------------------------|------------------|---------------|----------------------|--------------------------------|---------------------------------|
|      |                                                                                                                                |                                                    | ---Negativo/Malo---                               |                                |                  |               | ---Positivo/Bueno--- |                                |                                 |
|      | DESDE QUE QUEDÓ EMBARAZADA:                                                                                                    |                                                    | Extrema-<br>damente<br>Negativo                   | Moderada<br>-mente<br>Negativo | Algo<br>Negativo | No<br>Impacto | Algo<br>Positivo     | Moderada-<br>mente<br>Positivo | Extrema-<br>damente<br>Positivo |
| 119. | ¿Ha experimentado la muerte de alguna amistad cercana?                                                                         | NO (0) SÍ (1) →<br><br>REHÚSA (98)<br>NO SABE (99) | -3                                                | -2                             | -1               | 0             | +1                   | +2                             | +3                              |
| 120. | ¿Ha tenido un logro personal exitoso?                                                                                          | NO (0) SÍ (1) →<br><br>REHÚSA (98)<br>NO SABE (99) | -3                                                | -2                             | -1               | 0             | +1                   | +2                             | +3                              |
| 121. | ¿Ha tenido una violación menor de las leyes? (tales como multa de tráfico o disturbar la paz)                                  | NO (0) SÍ (1) →<br><br>REHÚSA (98)<br>NO SABE (99) | -3                                                | -2                             | -1               | 0             | +1                   | +2                             | +3                              |
| 122. | ¿Cambió de situación de trabajo (tales como cambio de responsabilidad, cambios en condiciones de trabajo u horas de trabajo)?  | NO (0) SÍ (1) →<br><br>REHÚSA (98)<br>NO SABE (99) | -3                                                | -2                             | -1               | 0             | +1                   | +2                             | +3                              |
| 123. | ¿Comenzó un nuevo trabajo?                                                                                                     | NO (0) SÍ (1) →<br><br>REHÚSA (98)<br>NO SABE (99) | -3                                                | -2                             | -1               | 0             | +1                   | +2                             | +3                              |
| 124. | ¿Tuvo uno de sus familiares cercanos una lesión seria o enfermedad (su hijo, padre, madre, hermana, hermano, abuelo/a u otro)? | NO (0) SÍ (1) →<br><br>REHÚSA (98)<br>NO SABE (99) | -3                                                | -2                             | -1               | 0             | +1                   | +2                             | +3                              |
| 125. | ¿Tiene dificultades sexuales?                                                                                                  | NO (0) SÍ (1) →<br><br>REHÚSA (98)<br>NO SABE (99) | -3                                                | -2                             | -1               | 0             | +1                   | +2                             | +3                              |
| 126. | ¿Tuvo problemas con su jefe (tales de que estuvo en peligro de perder su trabajo, ser suspendida, o degradada)?                | NO (0) SÍ (1) →<br><br>REHÚSA (98)<br>NO SABE (99) | -3                                                | -2                             | -1               | 0             | +1                   | +2                             | +3                              |
| 127. | ¿Tuvo problemas con sus suegros?                                                                                               | NO (0) SÍ (1) →<br><br>REHÚSA (98)<br>NO SABE (99) | -3                                                | -2                             | -1               | 0             | +1                   | +2                             | +3                              |

|      |                                                                                                                |                                                | Impacto en su vida Negativo/Malo o Positivo/Bueno |                                |                  |               |                      |                                |                                 |
|------|----------------------------------------------------------------------------------------------------------------|------------------------------------------------|---------------------------------------------------|--------------------------------|------------------|---------------|----------------------|--------------------------------|---------------------------------|
|      |                                                                                                                |                                                | ---Negativo/Malo---                               |                                |                  |               | ---Positivo/Bueno--- |                                |                                 |
|      | DESDE QUE QUEDÓ EMBARAZADA:                                                                                    |                                                | Extrema-<br>damente<br>Negativo                   | Moderada-<br>mente<br>Negativo | Algo<br>Negativo | No<br>Impacto | Algo<br>Positivo     | Moderada-<br>mente<br>Positivo | Extrema-<br>damente<br>Positivo |
| 128. | ¿Tuvo un cambio mayor en su estado financiero (mucho mejor o peor)?                                            | NO (0) SÍ (1) →<br>REHÚSA (98)<br>NO SBE (99)  | -3                                                | -2                             | -1               | 0             | +1                   | +2                             | +3                              |
| 129. | ¿Tuvo un cambio mayor en cercanía con un miembro de familia (más acercados o distanciados)?                    | NO (0) SÍ (1) →<br>REHÚSA (98)<br>NO SABE (99) | -3                                                | -2                             | -1               | 0             | +1                   | +2                             | +3                              |
| 130. | ¿Ganó un nuevo miembro en la familia (a través de adopción, un familiar que se mudó, sin incluir su embarazo)? | NO (0) SÍ (1) →<br>REHÚSA (98)<br>NO SABE (99) | -3                                                | -2                             | -1               | 0             | +1                   | +2                             | +3                              |
| 131. | ¿Se mudó a un nuevo lugar?                                                                                     | NO (0) SÍ (1) →<br>REHÚSA (98)<br>NO SABE (99) | -3                                                | -2                             | -1               | 0             | +1                   | +2                             | +3                              |
| 132. | ¿Tuvo una separación de su esposo o novio ya que no se llevaban bien?                                          | NO (0) SÍ (1) →<br>REHÚSA (98)<br>NO SABE (99) | -3                                                | -2                             | -1               | 0             | +1                   | +2                             | +3                              |
| 133. | ¿Tuvo un cambio mayor en las actividades de la iglesia (mayor asistencia o menor)?                             | NO (0) SÍ (1) →<br>REHÚSA (98)<br>NO SABE (99) | -3                                                | -2                             | -1               | 0             | +1                   | +2                             | +3                              |
| 134. | ¿Ha vuelto con su esposo o novio luego de una separación?                                                      | NO (0) SÍ (1) →<br>REHÚSA (98)<br>NO SABE (99) | -3                                                | -2                             | -1               | 0             | +1                   | +2                             | +3                              |
| 135. | ¿Tuvo un cambio mayor de número de discusiones que tiene con su esposo o novio (más discusiones o menos)?      | NO (0) SÍ (1) →<br>REHÚSA (98)<br>NO SABE (99) | -3                                                | -2                             | -1               | 0             | +1                   | +2                             | +3                              |
| 136. | ¿Tuvo su esposo o novio un cambio de trabajo (perdió su empleo o comenzó uno nuevo)?                           | NO (0) SÍ (1) →<br>REHÚSA (98)<br>NO SABE (99) | -3                                                | -2                             | -1               | 0             | +1                   | +2                             | +3                              |

|      |                                                                                                                                               |                                                    | Impacto en su vida Negativo/Malo o Positivo/Bueno |                                |                  |               |                      |                                |                                 |
|------|-----------------------------------------------------------------------------------------------------------------------------------------------|----------------------------------------------------|---------------------------------------------------|--------------------------------|------------------|---------------|----------------------|--------------------------------|---------------------------------|
|      |                                                                                                                                               |                                                    | ---Negativo/Malo---                               |                                |                  |               | ---Positivo/Bueno--- |                                |                                 |
|      | DESDE QUE QUEDÓ EMBARAZADA:                                                                                                                   |                                                    | Extrema-<br>damente<br>Negativo                   | Moderada-<br>mente<br>Negativo | Algo<br>Negativo | No<br>Impacto | Algo<br>Positivo     | Moderada-<br>mente<br>Positivo | Extrema-<br>damente<br>Positivo |
| 137. | ¿Tuvo un cambio en el tipo o cantidad de recreación?                                                                                          | NO (0) SÍ (1) →<br><br>REHÚSA (98)<br>NO SABE (99) | -3                                                | -2                             | -1               | 0             | +1                   | +2                             | +3                              |
| 138. | ¿Tomó prestado más de \$15,000 (como para comprar una casa o negocio)?                                                                        | NO (0) SÍ (1) →<br><br>REHÚSA (98)<br>NO SABE (99) | -3                                                | -2                             | -1               | 0             | +1                   | +2                             | +3                              |
| 139. | ¿Tomó prestado menos de \$15,000 (como para comprar un carro o préstamo estudiantil)?                                                         | NO (0) SÍ (1) →<br><br>REHÚSA (98)<br>NO SABE (99) | -3                                                | -2                             | -1               | 0             | +1                   | +2                             | +3                              |
| 140. | ¿Ha sido despedida de un empleo?                                                                                                              | NO (0) SÍ (1) →<br><br>REHÚSA (98)<br>NO SABE (99) | -3                                                | -2                             | -1               | 0             | +1                   | +2                             | +3                              |
| 141. | ¿Ha tenido una lesión o enfermedad personal seria?                                                                                            | NO (0) SÍ (1) →<br><br>REHÚSA (98)<br>NO SABE (99) | -3                                                | -2                             | -1               | 0             | +1                   | +2                             | +3                              |
| 142. | ¿Tuvo un cambio mayor en sus actividades sociales. Tales como fiestas, ir al cine, de visitas (aumentaron o disminuyeron)?                    | NO (0) SÍ (1) →<br><br>REHÚSA (98)<br>NO SABE (99) | -3                                                | -2                             | -1               | 0             | +1                   | +2                             | +3                              |
| 143. | ¿Tuvo un cambio mayor en las condiciones en las que vive su familia (construyó una casa nueva, remodeló, ha depreciado su casa o vecindario)? | NO (0) SÍ (1) →<br><br>REHÚSA (98)<br>NO SABE (99) | -3                                                | -2                             | -1               | 0             | +1                   | +2                             | +3                              |
| 144. | ¿Ha tenido un divorcio?                                                                                                                       | NO (0) SÍ (1) →<br><br>REHÚSA (98)<br>NO SABE (99) | -3                                                | -2                             | -1               | 0             | +1                   | +2                             | +3                              |
| 145. | ¿Tuvo un amigo cercano con una lesión o enfermedad seria?                                                                                     | NO (0) SÍ (1) →<br><br>REHÚSA (98)<br>NO SABE (99) | -3                                                | -2                             | -1               | 0             | +1                   | +2                             | +3                              |

|      |                                                                                             |                                                | Impacto en su vida Negativo/Malo o Positivo/Bueno |                                |                  |               |                      |                                |                                 |
|------|---------------------------------------------------------------------------------------------|------------------------------------------------|---------------------------------------------------|--------------------------------|------------------|---------------|----------------------|--------------------------------|---------------------------------|
|      |                                                                                             |                                                | ---Negativo/Malo---                               |                                |                  |               | ---Positivo/Bueno--- |                                |                                 |
|      | DESDE QUE QUEDÓ EMBARAZADA:                                                                 |                                                | Extrema-<br>damente<br>Negativo                   | Moderada-<br>mente<br>Negativo | Algo<br>Negativo | No<br>Impacto | Algo<br>Positivo     | Moderada-<br>mente<br>Positivo | Extrema-<br>damente<br>Positivo |
| 146. | Tuvo un hijo o hija que se haya ido de la casa porque se casó o por la escuela?             | NO (0) SÍ (1) →<br>REHÚSA (98)<br>NO SABE (99) | -3                                                | -2                             | -1               | 0             | +1                   | +2                             | +3                              |
| 147. | ¿Se ha dado de baja o graduado de la escuela?                                               | NO (0) SÍ (1) →<br>REHÚSA (98)<br>NO SABE (99) | -3                                                | -2                             | -1               | 0             | +1                   | +2                             | +3                              |
| 148. | ¿Tuvo una separación de su esposo o novio por el trabajo, viajes, o necesidades familiares? | NO (0) SÍ (1) →<br>REHÚSA (98)<br>NO SABE (99) | -3                                                | -2                             | -1               | 0             | +1                   | +2                             | +3                              |
| 149. | ¿Se ha comprometido para casarse?                                                           | NO (0) SÍ (1) →<br>REHÚSA (98)<br>NO SABE (99) | -3                                                | -2                             | -1               | 0             | +1                   | +2                             | +3                              |
| 150. | ¿Se ha ido de la casa por primera vez?                                                      | NO (0) SÍ (1) →<br>REHÚSA (98)<br>NO SABE (99) | -3                                                | -2                             | -1               | 0             | +1                   | +2                             | +3                              |
